# Supplementary material for: A wormhole attack detection method for tactical wireless sensor networks
Source: PeerJ journal article supplement (doi:10.7717/peerj-cs.1449), 2023-08-29
Supplement: raw_data_v2.zip [file raw_data_v2.zip]

## Sheet: Sheet1
ml	r1	R1	r1	R1	r2	R2	r1	R1	r2	R2	r3	R3	r4	R4	r1	R1	r2	R2	r3	R3	r4	R4	r5	R5	r6	R6	r7	R7	r8	R8	r1	R1	r2	R2	r3	R3	r4	R4	r5	R5	r6	R6	r7	R7	r8	R8	r9	R9	r10
1	421064	0.0891382	222350	0.047071	198714	0.0420673	11902	0.00251963	210448	0.0445513	138610	0.0293434	60104	0.0127239	0	0	11902	0.00251963	84008	0.0177843	126440	0.026767	84686	0.0179278	53924	0.0114156	42066	0.00890527	18038	0.0038186	0	0	0	0	485	0.000102673	11417	0.00241695	31638	0.00669769	52370	0.0110866	65730	0.0139149	60710	0.0128522	47495	0.0100546	37191
1	523401	0.112018	296694	0.0634986	226707	0.0485199	22777	0.00487474	273917	0.0586238	169299	0.0362334	57408	0.0122865	0	0	22777	0.00487474	121609	0.0260268	152308	0.032597	104732	0.0224148	64567	0.0138187	42194	0.00903038	15214	0.00325611	0	0	0	0	959	0.000205246	21818	0.0046695	51305	0.0109803	70304	0.0150465	79271	0.0169656	73037	0.0156314	58711	0.0125654	46021
1	687912	0.126201	370684	0.0680039	317228	0.0581972	24785	0.00454694	345899	0.063457	231528	0.042475	85700	0.0157221	0	0	24785	0.00454694	140550	0.0257846	205349	0.0376724	146306	0.0268406	85222	0.0156344	61040	0.0111981	24660	0.00452401	0	0	0	0	866	0.000158872	23919	0.00438807	59374	0.0108925	81176	0.0148922	102445	0.0187941	102904	0.0188783	83507	0.0153198	62799
1	596856	0.11031	170218	0.0314596	426638	0.0788509	14542	0.00268764	155676	0.0287719	257144	0.0475251	169494	0.0313257	0	0	14542	0.00268764	55195	0.0102011	100481	0.0185708	128282	0.023709	128862	0.0238162	114342	0.0211326	55152	0.0101931	0	0	0	0	1201	0.000221968	13341	0.00246567	22978	0.00424678	32217	0.00595432	44015	0.00813482	56466	0.010436	63838	0.0117985	64444
1	225109	0.0446671	15056	0.00298748	210053	0.0416797	151	3e-05	14905	0.00295752	78339	0.0155444	131714	0.0261353	0	0	151	3e-05	2739	0.000543485	12166	0.00241403	27939	0.00554378	50400	0.0100006	77775	0.0154325	53939	0.0107028	0	0	0	0	9	1.79e-06	142	2.82e-05	726	0.000144056	2013	0.000399429	4485	0.000889934	7681	0.0015241	11514	0.00228466	16425
1	372813	0.0783215	34310	0.00720793	338503	0.0711136	1016	0.000213444	33294	0.00699449	140336	0.0294821	198167	0.0416314	0	0	1016	0.000213444	7640	0.00160503	25654	0.00538946	54126	0.0113709	86210	0.0181112	110716	0.0232595	87451	0.0183719	0	0	0	0	72	1.51e-05	944	0.000198318	2346	0.000492854	5294	0.00111218	9818	0.00206259	15836	0.00332687	23067	0.00484597	31059
1	206194	0.038851	43111	0.00812296	163083	0.030728	3734	0.000703559	39377	0.0074194	74235	0.0139873	88848	0.0167407	0	0	3734	0.000703559	18094	0.00340926	21283	0.00401013	28328	0.00533755	45907	0.00864978	61374	0.0115641	27474	0.00517664	0	0	0	0	114	2.15e-05	3620	0.000682079	7667	0.00144461	10427	0.00196465	10759	0.00202721	10524	0.00198293	12184	0.0022957	16144
1	497726	0.0904635	112560	0.0204582	385166	0.0700053	5068	0.000921128	107492	0.0195371	210118	0.0381897	175048	0.0318156	0	0	5068	0.000921128	34919	0.00634666	72573	0.0131904	98951	0.0179847	111167	0.020205	114131	0.0207437	60917	0.0110719	0	0	0	0	136	2.47e-05	4932	0.000896409	12162	0.00221049	22757	0.00413617	31823	0.00578395	40750	0.00740646	47378	0.00861113	51573
1	242906	0.0457874	25359	0.00478013	217547	0.0410072	1339	0.000252399	24020	0.00452773	87187	0.0164346	130360	0.0245726	0	0	1339	0.000252399	6226	0.00117359	17794	0.00335414	34053	0.00641893	53134	0.0100157	71945	0.0135615	58415	0.0110111	0	0	0	0	106	2e-05	1233	0.000232418	2080	0.000392076	4146	0.000781514	7088	0.00133608	10706	0.00201806	14760	0.00278224	19293
1	295985	0.0561707	86443	0.0164048	209542	0.0397659	5238	0.000994044	81205	0.0154107	109752	0.0208282	99790	0.0189377	0	0	5238	0.000994044	33006	0.00626373	48199	0.00914698	53426	0.0101389	56326	0.0106893	61044	0.0115846	38746	0.00735304	0	0	0	0	451	8.56e-05	4787	0.000908455	12317	0.00233746	20689	0.00392626	23087	0.00438135	25112	0.00476564	26687	0.00506454	26739
2	720749	0.159971	211348	0.046909	509401	0.113062	7922	0.0017583	203426	0.0451507	334851	0.0743207	174550	0.0387416	0	0	7922	0.0017583	61026	0.0135448	142400	0.0316059	184466	0.0409425	150385	0.0333782	115108	0.0255484	59442	0.0131932	0	0	0	0	239	5.3e-05	7683	0.00170525	21345	0.00473756	39681	0.00880726	60189	0.013359	82211	0.0182469	94100	0.0208856	90366
2	806458	0.208503	297316	0.0768687	509142	0.131635	6143	0.00158822	291173	0.0752805	367308	0.0949646	141834	0.0366701	0	0	6143	0.00158822	87676	0.0226679	203497	0.0526126	218855	0.0565833	148453	0.0383814	97654	0.0252477	44180	0.0114224	0	0	0	0	48	1.24e-05	6095	0.00157581	29681	0.00767379	57995	0.0149942	88352	0.0228427	115145	0.0297698	117226	0.0303079	101629
2	635646	0.190629	285890	0.0857379	349756	0.104891	13502	0.00404923	272388	0.0816887	236131	0.0708153	113625	0.0340759	0	0	13502	0.00404923	99760	0.0299179	172628	0.0517708	140088	0.0420121	96043	0.0288031	74570	0.0223634	39055	0.0117125	0	0	0	0	494	0.00014815	13008	0.00390108	37096	0.011125	62664	0.0187928	83225	0.024959	89403	0.0268118	77067	0.0231123	63021
2	570537	0.15989	277696	0.0778226	292841	0.0820669	9795	0.00274499	267901	0.0750776	205973	0.0577227	86868	0.0243442	0	0	9795	0.00274499	95327	0.0267148	172574	0.0483628	126686	0.035503	79287	0.0222197	58021	0.01626	28847	0.0080842	0	0	0	0	316	8.86e-05	9479	0.00265643	33344	0.00934445	61983	0.0173704	85322	0.023911	87252	0.0244518	71226	0.0199607	55460
2	601100	0.124719	138855	0.0288102	462245	0.0959085	2530	0.000524935	136325	0.0282853	259414	0.0538243	202831	0.0420842	0	0	2530	0.000524935	38052	0.00789519	98273	0.0203901	131790	0.0273443	127624	0.02648	122231	0.025361	80600	0.0167232	0	0	0	0	76	1.58e-05	2454	0.000509166	11665	0.0024203	26387	0.00547489	42418	0.00880107	55855	0.011589	64497	0.0133821	67293
2	613883	0.142434	135718	0.0314895	478165	0.110944	5770	0.00133876	129948	0.0301507	252304	0.0585399	225861	0.0524046	0	0	5770	0.00133876	42872	0.00994722	87076	0.0202035	121853	0.0282725	130451	0.0302674	132739	0.0307983	93122	0.0216063	0	0	0	0	332	7.7e-05	5438	0.00126173	15840	0.00367522	27032	0.006272	37912	0.00879639	49164	0.0114071	58630	0.0136034	63223
2	592099	0.117249	196492	0.03891	395607	0.0783393	9478	0.00187686	187014	0.0370331	248852	0.0492785	146755	0.0290609	0	0	9478	0.00187686	69811	0.0138242	117203	0.0232089	127087	0.0251662	121765	0.0241123	112494	0.0222764	34261	0.00678447	0	0	0	0	406	8.04e-05	9072	0.00179647	25684	0.00508603	44127	0.00873817	56230	0.0111348	60973	0.0120741	63536	0.0125816	63551
2	711331	0.131193	161899	0.0298596	549432	0.101334	3296	0.000607893	158603	0.0292517	324690	0.0598837	224742	0.04145	0	0	3296	0.000607893	42746	0.0078838	115857	0.0213679	165292	0.0304854	159398	0.0293983	155055	0.0285973	69687	0.0128526	0	0	0	0	34	6.27e-06	3262	0.000601622	13417	0.00247454	29329	0.00540925	48425	0.00893119	67432	0.0124367	80998	0.0149387	84294
2	555062	0.0970698	184203	0.0322136	370859	0.0648562	13370	0.00233816	170833	0.0298754	180245	0.0315214	190614	0.0333348	0	0	13370	0.00233816	82774	0.0144756	88059	0.0153998	90664	0.0158554	89581	0.015666	107444	0.0187899	83170	0.0145448	0	0	0	0	1318	0.000230493	12052	0.00210766	41481	0.00725424	41293	0.00722136	41399	0.0072399	46660	0.00815995	46789	0.00818251	43875
2	606648	0.112301	283222	0.0524295	323426	0.0598719	26254	0.00486008	256968	0.0475694	207267	0.0383688	116159	0.0215031	0	0	26254	0.00486008	117531	0.0217571	139437	0.0258123	116958	0.021651	90309	0.0167178	78826	0.0145921	37333	0.006911	0	0	0	0	2932	0.000542766	23322	0.00431732	51910	0.00960947	65621	0.0121476	69403	0.0128477	70034	0.0129645	63210	0.0117013	53748
3	1105164	0.243095	380775	0.0837565	724389	0.159339	23868	0.00525008	356907	0.0785064	449203	0.0988082	275186	0.0605308	0	0	23868	0.00525008	139270	0.0306343	217637	0.0478721	240415	0.0528825	208788	0.0459257	171706	0.037769	103480	0.0227618	0	0	0	0	1702	0.000374377	22166	0.00487571	56724	0.0124772	82546	0.0181571	101971	0.0224299	115666	0.0254423	122551	0.0269567	117864
3	929290	0.263538	425352	0.120626	503938	0.142912	29330	0.00831771	396022	0.112308	369727	0.104851	134211	0.038061	0	0	29330	0.00831771	149250	0.0423259	246772	0.0699822	227157	0.0644196	142570	0.0404315	91050	0.0258209	43161	0.0122401	0	0	0	0	1957	0.000554987	27373	0.00776272	60005	0.0170169	89245	0.025309	115687	0.0328077	131085	0.0371745	124750	0.0353779	102407
3	1016495	0.30501	416564	0.124994	599931	0.180015	16617	0.0049861	399947	0.120008	396428	0.118952	203503	0.0610632	0	0	16617	0.0049861	139811	0.0419517	260136	0.0780565	228158	0.0684611	168270	0.0504911	135067	0.0405282	68436	0.0205349	0	0	0	0	404	0.000121224	16213	0.00486488	49750	0.014928	90061	0.0270237	123831	0.0371568	136305	0.0408997	123702	0.0371181	104456
3	990856	0.294765	384133	0.114274	606723	0.180491	10008	0.00297723	374125	0.111297	412638	0.122754	194085	0.0577374	0	0	10008	0.00297723	110407	0.0328444	263718	0.0784522	247412	0.0736014	165226	0.0491523	128108	0.0381102	65977	0.0196272	0	0	0	0	372	0.000110664	9636	0.00286657	34074	0.0101365	76333	0.0227079	120769	0.035927	142949	0.0425252	134458	0.0399993	112954
3	944622	0.217657	175177	0.0403637	769445	0.177293	2377	0.000547701	172800	0.039816	438519	0.101042	330926	0.0762509	0	0	2377	0.000547701	38176	0.00879639	134624	0.0310196	216635	0.0499163	221884	0.0511258	200918	0.0462949	130008	0.029956	0	0	0	0	41	9.45e-06	2336	0.000538254	11289	0.00260117	26887	0.00619522	52630	0.0121268	81994	0.0188928	103852	0.0239292	112783
3	1059958	0.245538	227333	0.0526615	832625	0.192877	9840	0.00227943	217493	0.050382	444611	0.102994	388014	0.0898831	0	0	9840	0.00227943	65892	0.0152638	151601	0.0351182	217418	0.0503647	227193	0.052629	226158	0.0523893	161856	0.0374938	0	0	0	0	507	0.000117446	9333	0.00216198	24217	0.00560984	41675	0.00965397	64648	0.0149756	86953	0.0201426	104210	0.0241401	113208
3	864913	0.197886	245039	0.0560632	619874	0.141823	11674	0.00267093	233365	0.0533923	365225	0.083561	254649	0.0582619	0	0	11674	0.00267093	81886	0.018735	151479	0.0346574	182442	0.0417415	182783	0.0418195	170622	0.0390371	84027	0.0192248	0	0	0	0	631	0.000144368	11043	0.00252656	30191	0.00690749	51695	0.0118275	69021	0.0157915	82458	0.0188658	90025	0.0205971	92417
3	1072239	0.192779	260850	0.0468986	811389	0.145881	14430	0.00259439	246420	0.0443042	451287	0.0811375	360102	0.0647433	0	0	14430	0.00259439	78487	0.0141113	167933	0.0301929	226804	0.0407774	224483	0.0403601	217029	0.03902	143073	0.0257233	0	0	0	0	276	4.96e-05	14154	0.00254477	30005	0.00539464	48482	0.00871665	72445	0.013025	95488	0.0171679	111579	0.0200609	115225
3	1161812	0.20937	234520	0.0422628	927292	0.167107	10411	0.00187616	224109	0.0403866	483479	0.0871276	443813	0.0799794	0	0	10411	0.00187616	87854	0.0158321	136255	0.0245545	221247	0.0398709	262232	0.0472568	257792	0.0464566	186021	0.0335228	0	0	0	0	694	0.000125066	9717	0.0017511	36319	0.00654504	51535	0.00928711	59072	0.0106453	77183	0.0139091	101399	0.0182731	119848
3	906973	0.162687	327359	0.0587195	579614	0.103967	16320	0.00292737	311039	0.0557921	353527	0.0634134	226087	0.040554	0	0	16320	0.00292737	120417	0.0215996	190622	0.0341925	192279	0.0344897	161248	0.0289236	138574	0.0248565	87513	0.0156975	0	0	0	0	921	0.000165203	15399	0.00276217	44661	0.008011	75756	0.0135886	91127	0.0163458	99495	0.0178468	99954	0.0179291	92325
4	1576916	0.286676	656244	0.119302	920672	0.167374	35930	0.00653191	620314	0.11277	635208	0.115478	285464	0.051896	0	0	35930	0.00653191	260032	0.0472726	360282	0.0654976	361399	0.0657007	273809	0.0497772	200142	0.0363849	85322	0.0155111	0	0	0	0	2383	0.000433218	33547	0.00609869	104233	0.0189491	155799	0.0283235	173820	0.0315997	186462	0.0338979	188361	0.0342432	173038
4	1274795	0.297045	487289	0.113545	787506	0.1835	12837	0.00299119	474452	0.110554	600295	0.139877	187211	0.0436227	0	0	12837	0.00299119	144871	0.0337569	329581	0.0767968	367147	0.0855502	233148	0.0543266	141829	0.0330481	45382	0.0105746	0	0	0	0	655	0.000152624	12182	0.00283857	45969	0.0107114	98902	0.0230455	146730	0.0341901	182851	0.0426068	196863	0.0458717	170284
4	1254330	0.306986	497391	0.121732	756939	0.185254	10580	0.00258936	486811	0.119143	547215	0.133926	209724	0.051328	0	0	10580	0.00258936	155461	0.0380477	331350	0.0810949	319394	0.0781688	227821	0.0557571	160253	0.0392205	49471	0.0121076	0	0	0	0	352	8.61e-05	10228	0.00250321	47710	0.0116766	107751	0.0263711	154425	0.0377941	176925	0.0433008	171391	0.0419464	148003
4	1282748	0.305431	390605	0.0930057	892143	0.212425	4957	0.0011803	385648	0.0918254	626751	0.149234	265392	0.0631916	0	0	4957	0.0011803	89385	0.0212832	296263	0.0705422	362390	0.0862875	264361	0.0629461	194901	0.0464072	70491	0.0167844	0	0	0	0	146	3.48e-05	4811	0.00114553	23509	0.00559765	65876	0.0156855	123416	0.0293862	172847	0.041156	189780	0.0451879	172610
4	1275757	0.262481	300031	0.0617299	975726	0.200751	4219	0.000868038	295812	0.0608618	567244	0.116708	408482	0.0840431	0	0	4219	0.000868038	75094	0.0154502	220718	0.0454116	286010	0.0588451	281234	0.0578625	275495	0.0566817	132987	0.0273614	0	0	0	0	94	1.93e-05	4125	0.000848698	20724	0.00426386	54370	0.0111864	94531	0.0194493	126187	0.0259623	141987	0.0292131	144023
4	1564570	0.296372	310800	0.058874	1253770	0.237498	2120	0.000401586	308680	0.0584724	709792	0.134454	543978	0.103044	0	0	2120	0.000401586	70623	0.0133779	238057	0.0450945	348844	0.0660806	360948	0.0683734	360067	0.0682065	183911	0.0348378	0	0	0	0	33	6.25e-06	2087	0.000395335	16737	0.00317044	53886	0.0102075	98883	0.0187311	139174	0.0263633	169028	0.0320185	179816
4	1010281	0.224967	204795	0.0456033	805486	0.179364	1048	0.000233366	203747	0.0453699	478243	0.106494	327243	0.0728698	0	0	1048	0.000233366	35273	0.00785452	168474	0.0375154	233807	0.0520636	244436	0.0544305	239564	0.0533456	87679	0.0195242	0	0	0	0	46	1.02e-05	1002	0.000223123	6638	0.00147814	28635	0.00637638	68425	0.0152367	100049	0.0222787	114186	0.0254267	119621
4	1102511	0.196312	175470	0.0312439	927041	0.165068	350	6.23e-05	175120	0.0311816	507646	0.0903907	419395	0.0746769	0	0	350	6.23e-05	25365	0.00451646	149755	0.0266652	240100	0.0427519	267546	0.0476389	275841	0.0491159	143554	0.025561	0	0	0	0	8	1.42e-06	342	6.09e-05	3937	0.000701017	21428	0.00381544	57785	0.0102891	91970	0.0163761	114038	0.0203054	126062
4	1068964	0.225869	335342	0.0708569	733622	0.155012	4156	0.000878152	331186	0.0699788	468158	0.0989206	265464	0.0560919	0	0	4156	0.000878152	92172	0.0194757	239014	0.0505031	257681	0.0544473	210477	0.0444733	176921	0.037383	88543	0.0187089	0	0	0	0	138	2.92e-05	4018	0.000848993	23923	0.00505487	68249	0.0144208	109507	0.0231386	129507	0.0273645	133350	0.0281765	124331
4	1537070	0.243802	379426	0.0601826	1157644	0.18362	13516	0.00214384	365910	0.0580388	628809	0.0997384	528835	0.0838811	0	0	13516	0.00214384	139189	0.0220774	226721	0.0359613	301676	0.0478503	327133	0.0518882	336013	0.0532967	192822	0.0305844	0	0	0	0	527	8.36e-05	12989	0.00206025	52729	0.0083636	86460	0.0137138	103361	0.0163946	123360	0.0195667	144198	0.0228719	157478
5	1944811	0.323976	809834	0.134906	1134977	0.18907	28734	0.00478664	781100	0.130119	803652	0.133876	331325	0.0551936	0	0	28734	0.00478664	338852	0.0564475	442248	0.0736717	452198	0.0753292	351454	0.0585468	238528	0.0397351	92797	0.0154586	0	0	0	0	1165	0.000194071	27569	0.00459257	130408	0.021724	208444	0.0347236	215841	0.0359558	226407	0.0377159	232148	0.0386723	220050
5	1761301	0.33005	610690	0.114437	1150611	0.215613	7361	0.00137938	603329	0.113058	871948	0.163394	278663	0.0522187	0	0	7361	0.00137938	161891	0.0303368	441438	0.0827211	523872	0.0981684	348076	0.065226	208945	0.0391542	69718	0.0130645	0	0	0	0	220	4.12e-05	7141	0.00133815	42798	0.00801992	119093	0.0223168	193779	0.0363122	247659	0.0464088	272697	0.0511007	251175
5	2118509	0.386923	876523	0.160088	1241986	0.226836	21152	0.00386319	855371	0.156225	889155	0.162395	352831	0.0644409	0	0	21152	0.00386319	306557	0.0559894	548814	0.100235	510011	0.0931482	379144	0.0692467	277317	0.050649	75514	0.0137918	0	0	0	0	638	0.000116524	20514	0.00374667	101255	0.0184932	205302	0.0374963	263292	0.0480875	285522	0.0521476	271294	0.049549	238717
5	1849551	0.370561	596206	0.119451	1253345	0.25111	9659	0.0019352	586547	0.117516	877046	0.175718	376299	0.0753922	0	0	9659	0.0019352	154332	0.0309207	432215	0.0865951	499680	0.100112	377366	0.075606	281089	0.0563167	95210	0.0190755	0	0	0	0	249	4.99e-05	9410	0.00188531	44266	0.00886878	110066	0.0220519	188873	0.0378411	243342	0.048754	258756	0.0518423	240924
5	1739729	0.314614	441955	0.0799236	1297774	0.234691	5830	0.0010543	436125	0.0788693	755535	0.136632	542239	0.098059	0	0	5830	0.0010543	122460	0.0221458	313665	0.0567235	384648	0.0695601	370887	0.0670716	362635	0.0655793	179604	0.0324798	0	0	0	0	101	1.83e-05	5729	0.00103604	35120	0.00635113	87340	0.0157947	139151	0.0251642	174514	0.0315593	191304	0.0345956	193344
5	2082532	0.295395	460399	0.0653049	1622133	0.23009	5527	0.000783973	454872	0.064521	925643	0.131297	696490	0.0987931	0	0	5527	0.000783973	123413	0.0175054	331459	0.0470155	445711	0.0632215	479932	0.0680756	480318	0.0681303	216172	0.0306627	0	0	0	0	103	1.46e-05	5424	0.000769363	33495	0.00475107	89918	0.0127543	147490	0.0209206	183969	0.0260949	213498	0.0302835	232213
5	1487203	0.279466	445203	0.0836597	1042000	0.195806	6972	0.00131013	438231	0.0823496	651809	0.122484	390191	0.0733222	0	0	6972	0.00131013	131064	0.0246287	307167	0.0577209	338612	0.0636298	313197	0.058854	299784	0.0563335	90407	0.0169887	0	0	0	0	283	5.32e-05	6689	0.00125695	35049	0.00658619	96015	0.0180425	143032	0.0268777	164135	0.0308432	170684	0.0320739	167928
5	1684540	0.250441	441564	0.0656473	1242976	0.184793	6795	0.00101021	434769	0.0646371	747735	0.111166	495241	0.0736275	0	0	6795	0.00101021	131771	0.0195904	302998	0.0450467	369750	0.0549708	377985	0.0561951	376400	0.0559594	118841	0.0176681	0	0	0	0	106	1.58e-05	6689	0.000994454	36453	0.00541947	95318	0.0141709	140979	0.0209594	162019	0.0240874	180624	0.0268534	189126
5	2137852	0.359431	512290	0.0861299	1625562	0.273301	11396	0.00191598	500894	0.084214	897787	0.150943	727775	0.122359	0	0	11396	0.00191598	165597	0.0278414	335297	0.0563726	442585	0.0744106	455202	0.0765319	458212	0.0770379	269563	0.0453209	0	0	0	0	391	6.57e-05	11005	0.00185024	55414	0.00931661	110183	0.0185248	149251	0.0250932	186046	0.0312794	214953	0.0361395	227632
5	1591766	0.299037	503397	0.0945706	1088369	0.204466	5981	0.00112362	497416	0.093447	712535	0.13386	375834	0.070606	0	0	5981	0.00112362	144546	0.0271551	352870	0.0662919	390299	0.0733235	322236	0.0605368	263318	0.0494682	112516	0.0211378	0	0	0	0	234	4.4e-05	5747	0.00107966	35101	0.00659424	109445	0.0205609	164276	0.0308617	188594	0.0354302	199366	0.0374539	190933
6	2070042	0.407781	879349	0.173224	1190693	0.234556	39466	0.00777446	839883	0.16545	826800	0.162873	363893	0.0716838	0	0	39466	0.00777446	381208	0.0750947	458675	0.090355	460246	0.0906645	366554	0.072208	254601	0.0501542	109292	0.0215296	0	0	0	0	1653	0.000325627	37813	0.00744884	155021	0.0305378	226187	0.0445569	227554	0.0448262	231121	0.0455289	234459	0.0461864	225787
6	2123303	0.393896	842117	0.156222	1281186	0.237674	15477	0.00287116	826640	0.153351	976641	0.181178	304545	0.0564965	0	0	15477	0.00287116	269539	0.0500025	557101	0.103348	587545	0.108996	389096	0.0721816	249159	0.0462218	55386	0.0102747	0	0	0	0	367	6.81e-05	15110	0.00280307	83921	0.0155683	185618	0.0344342	256212	0.0475302	300889	0.0558183	312486	0.0579696	275059
6	2349347	0.439901	900358	0.168587	1448989	0.271315	15242	0.00285397	885116	0.165733	1051656	0.196916	397333	0.0743982	0	0	15242	0.00285397	274816	0.0514576	610300	0.114275	599225	0.112201	452431	0.084715	331333	0.0620401	66000	0.0123581	0	0	0	0	438	8.2e-05	14804	0.00277196	79768	0.0149361	195048	0.0365216	287286	0.0537926	323014	0.0604824	316465	0.0592562	282760
6	2227148	0.431257	810537	0.156949	1416611	0.274307	12166	0.00235578	798371	0.154594	1016254	0.196784	400357	0.0775237	0	0	12166	0.00235578	228022	0.0441533	570349	0.11044	591934	0.11462	424320	0.0821638	319631	0.0618922	80726	0.0156315	0	0	0	0	358	6.93e-05	11808	0.00228646	63411	0.0122787	164611	0.0318747	258879	0.0501284	311470	0.0603119	312111	0.060436	279823
6	2180430	0.309864	345917	0.0491587	1834513	0.260705	1238	0.000175934	344679	0.0489828	1078529	0.153271	755984	0.107434	0	0	1238	0.000175934	53381	0.00758604	291298	0.0413967	518598	0.0736986	559931	0.0795725	548882	0.0780023	207102	0.0294315	0	0	0	0	49	6.96e-06	1189	0.00016897	11040	0.00156891	42341	0.00601713	106958	0.0151999	184340	0.0261968	243993	0.0346742	274605
6	2160305	0.359568	507277	0.0844328	1653028	0.275135	6237	0.00103811	501040	0.0833947	979988	0.163112	673040	0.112023	0	0	6237	0.00103811	137523	0.0228898	363517	0.0605049	482045	0.0802331	497943	0.0828792	485399	0.0807913	187641	0.0312316	0	0	0	0	156	2.6e-05	6081	0.00101214	35674	0.00593769	101849	0.0169521	163063	0.0271407	200454	0.0333642	232464	0.038692	249581
6	1574590	0.310529	400238	0.0789319	1174352	0.231597	2286	0.000450828	397952	0.0784811	761512	0.15018	412840	0.0814172	0	0	2286	0.000450828	78656	0.0155119	319296	0.0629692	397043	0.0783019	364469	0.0718778	339255	0.0669053	73585	0.0145119	0	0	0	0	108	2.13e-05	2178	0.000429529	15478	0.00305245	63178	0.0124595	135147	0.0266527	184149	0.0363165	201395	0.0397176	195648
6	1749865	0.313226	493796	0.0883895	1256069	0.224836	7079	0.00126714	486717	0.0871224	776173	0.138935	479896	0.0859014	0	0	7079	0.00126714	151306	0.0270838	335411	0.0600386	395695	0.0708294	380478	0.0681056	367513	0.0657849	112383	0.0201166	0	0	0	0	178	3.19e-05	6901	0.00123528	40999	0.00733882	110307	0.019745	156420	0.0279992	178991	0.0320394	196461	0.0351665	199234
6	1994172	0.32752	425644	0.0699072	1568528	0.257613	4329	0.000710989	421315	0.0691962	882474	0.144936	686054	0.112677	0	0	4329	0.000710989	100871	0.0165669	320444	0.0526293	437926	0.0719244	444548	0.073012	441006	0.0724303	245048	0.0402464	0	0	0	0	112	1.84e-05	4217	0.000692595	23555	0.00386864	77316	0.0126983	137338	0.0225562	183106	0.0300731	214109	0.035165	223817
6	1883564	0.343683	639591	0.116703	1243973	0.226981	8970	0.00163671	630621	0.115066	821854	0.149959	422119	0.0770217	0	0	8970	0.00163671	197945	0.0361179	432676	0.078948	450063	0.0821205	371791	0.0678386	314620	0.057407	107499	0.0196147	0	0	0	0	336	6.13e-05	8634	0.0015754	55602	0.0101454	142343	0.0259725	203116	0.0370614	229560	0.0418865	233293	0.0425677	216770
7	1842341	0.434907	814288	0.192223	1028053	0.242684	81653	0.0192752	732635	0.172947	701184	0.165523	326869	0.0771614	0	0	81653	0.0192752	348254	0.0822096	384381	0.0907378	386047	0.0911311	315137	0.0743919	223714	0.0528104	103155	0.024351	0	0	0	0	5763	0.00136043	75890	0.0179148	163328	0.0385556	184926	0.043654	187892	0.0443542	196489	0.0463836	198402	0.0468352	187645
7	1753718	0.457751	814732	0.212659	938986	0.245092	59693	0.0155809	755039	0.197078	672469	0.175526	266517	0.0695656	0	0	59693	0.0155809	331145	0.0864347	423894	0.110644	390455	0.101916	282014	0.0736106	193683	0.0505547	72834	0.019011	0	0	0	0	3199	0.000834995	56494	0.0147459	142653	0.0372349	188492	0.0491997	207840	0.0542499	216054	0.0563939	207439	0.0541452	183016
7	1685163	0.505554	773172	0.231954	911991	0.2736	59268	0.0177806	713904	0.214173	614927	0.18448	297064	0.0891201	0	0	59268	0.0177806	317198	0.0951604	396706	0.119013	341323	0.102398	273604	0.082082	219623	0.0658876	77441	0.0232325	0	0	0	0	3140	0.000942009	56128	0.0168386	134951	0.0404857	182247	0.0546746	198596	0.0595794	198110	0.0594336	180653	0.0541964	160670
7	1813885	0.455393	731737	0.183709	1082148	0.271683	33083	0.0083058	698654	0.175404	724154	0.181806	357994	0.0898777	0	0	33083	0.0083058	259426	0.0651313	439228	0.110272	411083	0.103206	313071	0.0785994	252602	0.0634181	105392	0.0264596	0	0	0	0	1184	0.000297254	31899	0.00800854	97101	0.0243781	162325	0.0407532	210435	0.0528317	228793	0.0574406	217411	0.0545831	193672
7	2087102	0.38005	516684	0.0940853	1570418	0.285964	8979	0.00163503	507705	0.0924503	900805	0.164032	669613	0.121933	0	0	8979	0.00163503	146519	0.0266803	361186	0.06577	456460	0.0831188	444345	0.0809128	431840	0.0786357	237773	0.0432971	0	0	0	0	342	6.23e-05	8637	0.00157275	47766	0.00869792	98753	0.0179824	157972	0.0287658	203214	0.0370041	226386	0.0412236	230074
7	1818447	0.418082	474528	0.109099	1343919	0.308982	17058	0.00392183	457470	0.105178	737772	0.169622	606147	0.13936	0	0	17058	0.00392183	159293	0.0366233	298177	0.0685543	368381	0.084695	369391	0.0849273	370290	0.0851339	235857	0.0542262	0	0	0	0	384	8.83e-05	16674	0.00383354	58927	0.013548	100366	0.0230753	134566	0.0309383	163611	0.0376161	180961	0.041605	187420
7	1621693	0.392049	625258	0.151158	996435	0.240891	41566	0.0100487	583692	0.141109	614201	0.148485	382234	0.0924062	0	0	41566	0.0100487	243582	0.0588867	340110	0.0822226	324037	0.0783369	290164	0.070148	279796	0.0676415	102438	0.0247647	0	0	0	0	2097	0.000506956	39469	0.00954175	97494	0.0235695	146088	0.0353172	166925	0.0403546	173185	0.041868	166969	0.0403653	157068
7	1921243	0.368992	657284	0.126237	1263959	0.242754	43629	0.00837933	613655	0.117858	752533	0.144531	511426	0.0982238	0	0	43629	0.00837933	265055	0.0509061	348600	0.0669517	386591	0.0742482	365942	0.0702824	355263	0.0682314	156163	0.0299925	0	0	0	0	1317	0.000252941	42312	0.00812639	115355	0.0221549	149700	0.0287512	165059	0.031701	183541	0.0352507	195017	0.0374547	191574
7	2218579	0.436515	685467	0.134868	1533112	0.301646	39929	0.00785619	645538	0.127012	856429	0.168506	676683	0.13314	0	0	39929	0.00785619	256106	0.0503899	389432	0.0766223	433486	0.0852902	422943	0.0832158	413247	0.081308	263436	0.0518321	0	0	0	0	2393	0.000470833	37536	0.00738536	106263	0.0209077	149843	0.0294822	181882	0.035786	207550	0.0408363	217247	0.0427442	216239
7	1922500	0.412128	746162	0.159955	1176338	0.252173	35385	0.00758551	710777	0.15237	753811	0.161595	422527	0.0905775	0	0	35385	0.00758551	290001	0.0621678	420776	0.0902021	405086	0.0868386	348725	0.0747565	295177	0.0632773	127350	0.0273001	0	0	0	0	1901	0.000407519	33484	0.00717799	111629	0.02393	178372	0.0382378	206035	0.0441679	214741	0.0460342	209908	0.0449982	195178
8	2507862	0.489683	1067817	0.208501	1440045	0.281182	58002	0.0113254	1009815	0.197176	1019063	0.198981	420982	0.0822005	0	0	58002	0.0113254	462422	0.0902921	547393	0.106883	562145	0.109764	456918	0.0892174	311038	0.060733	109944	0.0214676	0	0	0	0	1987	0.00038798	56015	0.0109374	198812	0.0388198	263610	0.0514722	268972	0.0525192	278421	0.0543642	287366	0.0561108	274779
8	2156356	0.469288	909555	0.197946	1246801	0.271341	43908	0.00955569	865647	0.188391	899189	0.19569	347612	0.0756508	0	0	43908	0.00955569	347320	0.0755872	518327	0.112803	516816	0.112475	382373	0.0832158	262675	0.0571659	84937	0.0184848	0	0	0	0	2039	0.000443747	41869	0.00911195	136448	0.0296952	210872	0.0458921	247764	0.0539209	270563	0.0588826	270152	0.0587932	246664
8	2184084	0.546845	907726	0.227274	1276358	0.319571	40390	0.0101127	867336	0.217161	861764	0.215766	414594	0.103805	0	0	40390	0.0101127	349780	0.0875769	517556	0.129584	476635	0.119339	385129	0.0964275	307104	0.0768918	107490	0.026913	0	0	0	0	1442	0.000361044	38948	0.00975169	134523	0.0336815	215257	0.0538954	255237	0.0639055	262319	0.0656787	250345	0.0626807	226290
8	1801920	0.461582	555696	0.142348	1246224	0.319235	9102	0.00233158	546594	0.140016	812195	0.208053	434029	0.111181	0	0	9102	0.00233158	149681	0.0383425	396913	0.101674	452282	0.115857	359913	0.0921958	302209	0.0774143	131820	0.0337672	0	0	0	0	212	5.43e-05	8890	0.00227728	44025	0.0112775	105656	0.027065	174720	0.0447565	222193	0.0569173	235462	0.0603163	216820
8	2011167	0.363385	464177	0.0838693	1546990	0.279516	6769	0.00122305	457408	0.0826462	868725	0.156965	678265	0.122552	0	0	6769	0.00122305	125492	0.0226744	331916	0.0599719	436133	0.0788022	432592	0.0781624	421815	0.0762152	256450	0.0463364	0	0	0	0	279	5.04e-05	6490	0.00117264	39401	0.00711912	86091	0.0155553	143562	0.0259393	188354	0.0340325	213755	0.0386221	222378
8	2058532	0.430946	530314	0.111019	1528218	0.319927	20636	0.00432007	509678	0.106699	830374	0.173836	697844	0.146091	0	0	20636	0.00432007	176867	0.0370264	332811	0.0696727	413840	0.0866358	416534	0.0871998	411709	0.0861897	286135	0.0599013	0	0	0	0	578	0.000121002	20058	0.00419907	66181	0.0138547	110686	0.0231717	150821	0.0315738	181990	0.0380989	201947	0.0422768	211893
8	1937879	0.433146	697731	0.155954	1240148	0.277192	33103	0.00739903	664628	0.148555	755259	0.168812	484889	0.10838	0	0	33103	0.00739903	258810	0.057848	405818	0.0907065	401792	0.0898067	353467	0.0790053	342376	0.0765263	142513	0.0318538	0	0	0	0	1726	0.000385787	31377	0.00701324	96513	0.0215721	162297	0.0362759	196086	0.0438282	209732	0.0468783	207157	0.0463028	194635
8	2015710	0.355044	584525	0.102957	1431185	0.252087	13646	0.00240359	570879	0.100554	835415	0.147149	595770	0.104938	0	0	13646	0.00240359	201287	0.0354544	369592	0.0650994	425727	0.0749869	409688	0.0721618	399312	0.0703342	196458	0.0346038	0	0	0	0	246	4.33e-05	13400	0.00236025	67825	0.0119466	133462	0.0235078	172834	0.0304427	196758	0.0346566	211395	0.0372348	214332
8	2459789	0.361939	575585	0.0846929	1884204	0.277246	19298	0.00283955	556287	0.0818533	1041076	0.153186	843128	0.12406	0	0	19298	0.00283955	172860	0.025435	383427	0.0564183	507609	0.0746907	533467	0.0784955	548769	0.0807471	294359	0.0433126	0	0	0	0	857	0.000126101	18441	0.00271345	59636	0.00877498	113224	0.01666	168886	0.0248503	214541	0.031568	246272	0.036237	261337
8	2331805	0.428338	834949	0.153375	1496856	0.274963	38349	0.00704447	796600	0.14633	928127	0.170491	568729	0.104472	0	0	38349	0.00704447	310878	0.0571063	485722	0.089224	494913	0.0909123	433214	0.0795786	392249	0.0720536	176480	0.0324182	0	0	0	0	2108	0.000387226	36241	0.00665724	117109	0.0215122	193769	0.0355941	232834	0.0427701	252888	0.0464539	255545	0.046942	239368
9	2872542	0.429593	849840	0.127095	2022702	0.302498	6043	0.00090374	843797	0.126191	1378835	0.206207	643867	0.0962914	0	0	6043	0.00090374	187693	0.0280698	656104	0.0981214	734075	0.109782	644760	0.0964249	517562	0.0774022	126305	0.0188891	0	0	0	0	140	2.09e-05	5903	0.000882803	43186	0.00645854	144507	0.0216113	287217	0.0429538	368887	0.0551677	373916	0.0559197	360159
9	2753840	0.477353	1013475	0.175677	1740365	0.301676	21197	0.00367431	992278	0.172002	1238127	0.214618	502238	0.0870584	0	0	21197	0.00367431	313299	0.0543075	678979	0.117695	701389	0.121579	536738	0.0930386	386715	0.0670335	115523	0.0200249	0	0	0	0	622	0.000107818	20575	0.00356649	94364	0.0163571	218935	0.0379504	320065	0.0554803	358914	0.0622145	364100	0.0631134	337289
9	2233270	0.521182	697040	0.162669	1536230	0.358513	11042	0.00257689	685998	0.160093	996757	0.232615	539473	0.125898	0	0	11042	0.00257689	183348	0.0427883	502650	0.117304	552381	0.12891	444376	0.103705	368138	0.085913	171335	0.0399848	0	0	0	0	458	0.000106884	10584	0.00247001	49488	0.0115491	133860	0.0312391	226881	0.0529476	275769	0.0643567	285479	0.0666227	266902
9	1931081	0.478798	486381	0.120595	1444700	0.358203	5441	0.00134906	480940	0.119246	921698	0.228529	523002	0.129675	0	0	5441	0.00134906	103701	0.0257119	377239	0.0935338	498071	0.123493	423627	0.105035	338169	0.0838466	184833	0.045828	0	0	0	0	185	4.59e-05	5256	0.00130319	27264	0.00675992	76437	0.018952	155824	0.0386355	221415	0.0548983	251164	0.0622744	246907
9	2140317	0.368066	367778	0.063246	1772539	0.30482	2493	0.000428716	365285	0.0628173	955100	0.164247	817439	0.140573	0	0	2493	0.000428716	65324	0.0112336	299961	0.0515837	471586	0.0810976	483514	0.0831489	469833	0.0807962	347606	0.0597771	0	0	0	0	100	1.72e-05	2393	0.000411519	16310	0.0028048	49014	0.00842883	115019	0.0197796	184942	0.0318041	227326	0.0390928	244260
9	2094806	0.411857	429151	0.0843747	1665655	0.327482	7618	0.00149776	421533	0.082877	859343	0.168954	806312	0.158528	0	0	7618	0.00149776	109888	0.0216049	311645	0.0612721	414290	0.0814529	445053	0.0875012	448973	0.0882719	357339	0.0702559	0	0	0	0	326	6.41e-05	7292	0.00143367	30911	0.00607737	78977	0.0155275	135806	0.0267006	175839	0.0345714	199945	0.0393109	214345
9	1871315	0.403458	473098	0.102001	1398217	0.301457	5918	0.00127593	467180	0.100725	833568	0.179718	564649	0.121739	0	0	5918	0.00127593	107808	0.0232436	359372	0.0774811	435037	0.0937946	398531	0.0859238	372954	0.0804094	191695	0.0413297	0	0	0	0	199	4.29e-05	5719	0.00123302	26625	0.00574039	81183	0.0175032	155461	0.0335176	203911	0.0439635	220099	0.0474536	214938
9	2056289	0.373889	434387	0.0789834	1621902	0.294906	3570	0.000649123	430817	0.0783342	913807	0.166155	708095	0.128751	0	0	3570	0.000649123	89721	0.0163137	341096	0.0620205	448896	0.0816215	464911	0.0845335	458034	0.083283	250061	0.0454679	0	0	0	0	57	1.04e-05	3513	0.000638759	20153	0.00366436	69568	0.0126494	144542	0.0262817	196554	0.0357389	219267	0.0398687	229629
9	2419501	0.365472	486501	0.0734873	1933000	0.291985	11474	0.00173318	475027	0.0717541	1018560	0.153856	914440	0.138129	0	0	11474	0.00173318	125299	0.0189268	349728	0.0528274	491356	0.0742207	527204	0.0796356	540120	0.0815866	374320	0.0565421	0	0	0	0	500	7.55e-05	10974	0.00165765	37039	0.00559484	88260	0.0133319	148944	0.0224984	200784	0.030329	236877	0.0357809	254479
9	2050308	0.441535	639745	0.137769	1410563	0.303765	14035	0.00302244	625710	0.134747	845831	0.18215	564732	0.121615	0	0	14035	0.00302244	194694	0.0419274	431016	0.0928195	455360	0.098062	390471	0.0840881	357299	0.0769445	207433	0.0446708	0	0	0	0	767	0.000165174	13268	0.00285727	57428	0.0123671	137266	0.0295603	202064	0.0435146	228952	0.0493049	234217	0.0504387	221143
10	2444442	0.529978	319220	0.0692098	2125222	0.460768	32	6.94e-06	319188	0.0692029	1529624	0.331637	595598	0.129131	0	0	32	6.94e-06	13573	0.00294275	305615	0.0662601	807447	0.175062	722177	0.156575	419697	0.0909942	175901	0.038137	0	0	0	0	0	0	32	6.94e-06	897	0.000194478	12676	0.00274827	81206	0.0176062	224409	0.0486539	372719	0.0808089	434728
10	2345088	0.53479	843036	0.192252	1502052	0.342538	17665	0.00402845	825371	0.188223	1069158	0.243818	432894	0.0987202	0	0	17665	0.00402845	237337	0.054124	588034	0.134099	629049	0.143453	440109	0.100366	300617	0.0685548	132277	0.0301654	0	0	0	0	686	0.00015644	16979	0.00387201	68533	0.0156287	168804	0.0384952	269105	0.0613686	318929	0.0727308	329643	0.0751741	299406
10	1893572	0.55608	442169	0.129851	1451403	0.426229	2865	0.000841356	439304	0.129009	949368	0.278798	502035	0.147431	0	0	2865	0.000841356	73266	0.0215158	366038	0.107493	529802	0.155585	419566	0.123213	332630	0.0976825	169405	0.0497487	0	0	0	0	125	3.67e-05	2740	0.000804648	15432	0.00453187	57834	0.0169839	140769	0.0413392	225269	0.0661541	268066	0.0787222	261736
10	1888402	0.538974	471215	0.134491	1417187	0.404483	5614	0.00160231	465601	0.132888	917604	0.261896	499583	0.142587	0	0	5614	0.00160231	93690	0.0267403	371911	0.106148	521902	0.148957	395702	0.112938	307251	0.0876933	192332	0.054894	0	0	0	0	196	5.59e-05	5418	0.00154637	23482	0.00670206	70208	0.0200382	148454	0.0423706	223457	0.0637774	268143	0.0765314	253759
10	2376201	0.429528	227023	0.0410373	2149178	0.388491	483	8.73e-05	226540	0.04095	1036571	0.187373	1112607	0.201118	0	0	483	8.73e-05	24843	0.00449069	201697	0.0364593	457471	0.0826937	579100	0.10468	619760	0.112029	492847	0.0890883	0	0	0	0	6	1.08e-06	477	8.62e-05	4457	0.000805659	20386	0.00368503	65257	0.011796	136440	0.0246633	205815	0.0372037	251656
10	2074096	0.444691	429846	0.0921601	1644250	0.352531	9766	0.00209385	420080	0.0900662	855221	0.183362	789029	0.16917	0	0	9766	0.00209385	108524	0.0232678	311556	0.0667984	420070	0.0900641	435151	0.0932975	435017	0.0932687	354012	0.0759011	0	0	0	0	345	7.4e-05	9421	0.00201989	32423	0.00695157	76101	0.0163162	133229	0.0285646	178327	0.0382338	205030	0.043959	215040
10	1919295	0.401793	255928	0.053577	1663367	0.348216	637	0.000133352	255291	0.0534436	957516	0.20045	705851	0.147766	0	0	637	0.000133352	23848	0.00499243	231443	0.0484512	477213	0.0999016	480303	0.100549	452188	0.0946628	253663	0.0531028	0	0	0	0	20	4.19e-06	617	0.000129165	3962	0.000829421	19886	0.00416301	72609	0.0152003	158834	0.0332509	227014	0.047524	250199
10	2164210	0.396069	412211	0.0754381	1751999	0.320631	4177	0.000764426	408034	0.0746737	988016	0.180815	763983	0.139815	0	0	4177	0.000764426	77979	0.0142708	330055	0.0604029	485926	0.0889286	502090	0.0918867	489045	0.0894994	274938	0.050316	0	0	0	0	113	2.07e-05	4064	0.000743746	17886	0.00327329	60093	0.0109975	131884	0.0241359	198171	0.036267	235483	0.0430954	250443
10	2144424	0.3476	141865	0.0229956	2002559	0.324604	333	5.4e-05	141532	0.0229416	869910	0.141008	1132649	0.183596	0	0	333	5.4e-05	12713	0.00206071	128819	0.0208809	327782	0.0531318	542128	0.0878761	650068	0.105373	482581	0.0782239	0	0	0	0	10	1.62e-06	323	5.24e-05	1936	0.000313816	10777	0.0017469	43017	0.00697283	85802	0.0139081	135555	0.0219728	192227
10	2130325	0.393078	456744	0.0842763	1673581	0.308802	5522	0.00101889	451222	0.0832574	1007112	0.185828	666469	0.122974	0	0	5522	0.00101889	86462	0.0159536	364760	0.0673039	529486	0.0976984	477626	0.0881294	426549	0.0787049	239920	0.044269	0	0	0	0	277	5.11e-05	5245	0.000967784	21260	0.0039228	65202	0.0120308	142214	0.0262407	222546	0.0410632	265017	0.0488997	264469
11	2779142	0.554662	682027	0.136119	2097115	0.418543	3011	0.000600936	679016	0.135518	1507264	0.30082	589851	0.117723	0	0	3011	0.000600936	110193	0.0219923	568823	0.113526	861944	0.172027	645320	0.128793	382452	0.0763299	207399	0.0413927	0	0	0	0	55	1.1e-05	2956	0.000589959	22326	0.00445583	87867	0.0175365	223419	0.04459	345404	0.0689358	428312	0.0854826	433632
11	2484358	0.575158	899259	0.208189	1585099	0.366969	34443	0.00797396	864816	0.200215	1056698	0.244638	528401	0.122331	0	0	34443	0.00797396	308475	0.0714156	556341	0.128799	595936	0.137966	460762	0.106672	332373	0.0769482	196028	0.0453828	0	0	0	0	1351	0.000312772	33092	0.00766119	113787	0.026343	194688	0.0450726	261726	0.0605926	294615	0.0682068	307940	0.0712917	287996
11	2187357	0.594318	584884	0.158917	1602473	0.435402	9310	0.00252958	575574	0.156387	1029517	0.279726	572956	0.155676	0	0	9310	0.00252958	142885	0.0388227	432689	0.117564	568758	0.154535	460759	0.125191	354599	0.0963467	218357	0.0593289	0	0	0	0	244	6.63e-05	9066	0.00246329	41909	0.0113869	100976	0.0274358	182074	0.0494706	250615	0.0680936	289419	0.0786369	279339
11	2099909	0.559261	588610	0.156762	1511299	0.402499	10838	0.00288645	577772	0.153876	909658	0.242266	601641	0.160233	0	0	10838	0.00288645	159570	0.0424977	418202	0.111378	501754	0.13363	407904	0.108636	336617	0.08965	265024	0.0705829	0	0	0	0	337	8.98e-05	10501	0.00279669	50907	0.0135579	108663	0.0289398	182128	0.0485055	236074	0.0628727	257957	0.0687007	243797
11	2494030	0.41899	453867	0.0762484	2040163	0.342742	7290	0.0012247	446577	0.0750237	1014269	0.170394	1025894	0.172347	0	0	7290	0.0012247	121004	0.0203283	325573	0.0546954	485295	0.0815282	528974	0.0888662	542022	0.0910582	483872	0.0812892	0	0	0	0	291	4.89e-05	6999	0.00117581	41117	0.00690754	79887	0.0134208	136175	0.022877	189398	0.0318183	231007	0.0388085	254288
11	2350951	0.397264	550567	0.0930349	1800384	0.304229	18394	0.00310822	532173	0.0899267	904693	0.152875	895691	0.151354	0	0	18394	0.00310822	186585	0.0315292	345588	0.0583975	436054	0.0736845	468639	0.0791907	478290	0.0808215	417401	0.0705325	0	0	0	0	655	0.000110682	17739	0.00299754	71107	0.0120157	115478	0.0195135	157947	0.0266899	187641	0.0317076	210237	0.0355259	225817
11	2497421	0.387736	553607	0.0859501	1943814	0.301786	9928	0.00154137	543679	0.0844087	1117405	0.173482	826409	0.128304	0	0	9928	0.00154137	137394	0.0213311	406285	0.0630777	557418	0.0865418	559987	0.0869406	539594	0.0837745	286815	0.0445294	0	0	0	0	556	8.63e-05	9372	0.00145505	41459	0.00643671	95935	0.0148944	170874	0.026529	235411	0.0365487	272322	0.0422793	285096
11	3061969	0.416807	501614	0.0682816	2560355	0.348525	3226	0.000439136	498388	0.0678425	1340195	0.182433	1220160	0.166093	0	0	3226	0.000439136	96810	0.0131782	401578	0.0546644	631607	0.0859768	708588	0.0964557	757006	0.103047	463154	0.0630463	0	0	0	0	88	1.2e-05	3138	0.000427157	22819	0.00310621	73991	0.0100719	159173	0.0216672	242405	0.0329971	300273	0.0408743	331334
11	2594818	0.412034	384789	0.0611011	2210029	0.350933	8081	0.00128319	376708	0.0598179	1007379	0.159963	1202650	0.19097	0	0	8081	0.00128319	92490	0.0146866	284218	0.0451313	446500	0.0709002	560879	0.0890626	650187	0.103244	552463	0.0877262	0	0	0	0	356	5.65e-05	7725	0.00122666	25802	0.00409713	66688	0.0105895	118361	0.0187947	165857	0.0263366	207993	0.0330274	238507
11	2512929	0.402004	528531	0.0845514	1984398	0.317453	8181	0.00130875	520350	0.0832427	1107766	0.177214	876632	0.140239	0	0	8181	0.00130875	116710	0.0186706	403640	0.0645721	559316	0.0894762	548450	0.087738	527283	0.0843518	349349	0.0558869	0	0	0	0	410	6.56e-05	7771	0.00124316	31073	0.00497089	85637	0.0136997	165677	0.0265041	237963	0.038068	276709	0.0442664	282607
12	2749690	0.588242	1152202	0.246491	1597488	0.341751	65738	0.0140634	1086464	0.232428	1037657	0.221986	559831	0.119765	0	0	65738	0.0140634	470339	0.10062	616125	0.131808	567876	0.121486	469781	0.1005	352984	0.075514	206847	0.0442509	0	0	0	0	2251	0.000481557	63487	0.0135818	186645	0.0399291	283694	0.0606908	313337	0.0670323	302788	0.0647756	293132	0.0627099	274744
12	2513932	0.574319	974260	0.222574	1539672	0.351745	40921	0.00934858	933339	0.213225	1018723	0.232732	520949	0.119013	0	0	40921	0.00934858	356450	0.0814326	576889	0.131793	580191	0.132547	438532	0.100185	318750	0.0728199	202199	0.0461933	0	0	0	0	1363	0.000311383	39558	0.0090372	135697	0.0310006	220753	0.050432	276368	0.0631375	300521	0.0686554	302967	0.0692142	277224
12	2420251	0.566298	721472	0.168812	1698779	0.397485	13920	0.00325704	707552	0.165555	1026799	0.240253	671980	0.157232	0	0	13920	0.00325704	212995	0.0498372	494557	0.115718	562880	0.131704	463919	0.108549	385271	0.0901469	286709	0.067085	0	0	0	0	551	0.000128925	13369	0.00312812	69556	0.0162749	143439	0.0335623	223253	0.0522374	271304	0.0634805	288233	0.0674416	274647
12	2246303	0.519963	529552	0.122578	1716751	0.397385	6249	0.00144649	523303	0.121132	1021647	0.236486	695104	0.160899	0	0	6249	0.00144649	132260	0.0306149	391043	0.0905167	536142	0.124103	485505	0.112382	399530	0.0924812	295574	0.068418	0	0	0	0	161	3.73e-05	6088	0.00140922	40360	0.00934233	91900	0.0212726	164785	0.0381436	226258	0.0523731	265047	0.0613518	271095
12	2180659	0.406585	382779	0.0713694	1797880	0.335216	5888	0.00109782	376891	0.0702716	872461	0.162671	925419	0.172545	0	0	5888	0.00109782	98768	0.0184154	278123	0.0518562	416822	0.0777167	455639	0.0849542	467259	0.0871207	458160	0.0854242	0	0	0	0	279	5.2e-05	5609	0.0010458	32139	0.00599234	66629	0.012423	115696	0.0215716	162427	0.0302846	197390	0.0368035	219432
12	2006956	0.398565	345509	0.0686152	1661447	0.32995	5839	0.00115958	339670	0.0674557	768546	0.152627	892901	0.177323	0	0	5839	0.00115958	96372	0.0191387	243298	0.048317	355144	0.0705287	413402	0.0820982	445699	0.0885121	447202	0.0888106	0	0	0	0	245	4.87e-05	5594	0.00111092	33189	0.00659106	63183	0.0125476	103908	0.0206353	139390	0.0276817	167273	0.033219	187871
12	2278225	0.420076	608283	0.11216	1669942	0.307917	20379	0.00375764	587904	0.108402	936587	0.172695	733355	0.135222	0	0	20379	0.00375764	182968	0.033737	404936	0.0746652	485565	0.0895322	451022	0.0831629	418847	0.0772302	314508	0.0579914	0	0	0	0	826	0.000152304	19553	0.00360533	64676	0.0119255	118292	0.0218116	180621	0.0333043	224315	0.0413609	243304	0.0448622	242261
12	2293839	0.405536	503855	0.0890782	1789984	0.316457	11607	0.00205204	492248	0.0870262	934480	0.16521	855504	0.151247	0	0	11607	0.00205204	141966	0.0250986	350282	0.0619275	458547	0.0810681	475933	0.0841418	474910	0.0839609	380594	0.0672865	0	0	0	0	270	4.77e-05	11337	0.00200431	46092	0.00814876	95874	0.0169499	152925	0.0270361	197357	0.0348914	222839	0.0393965	235708
12	1996416	0.49509	527913	0.130917	1468503	0.364173	19890	0.00493251	508023	0.125984	781218	0.193734	687285	0.170439	0	0	19890	0.00493251	152944	0.0379285	355079	0.0880558	407085	0.100953	374133	0.092781	358885	0.0889996	328400	0.0814397	0	0	0	0	934	0.000231622	18956	0.00470089	50050	0.0124119	102894	0.0255166	161040	0.0399362	194039	0.0481196	205450	0.0509494	201635
[truncated: 205 more columns]
